# Supplementary material
Source: MDPI journal article supplement (https://www.mdpi.com/1999-4907/10/3/265)
Supplement: s1 [file s1]

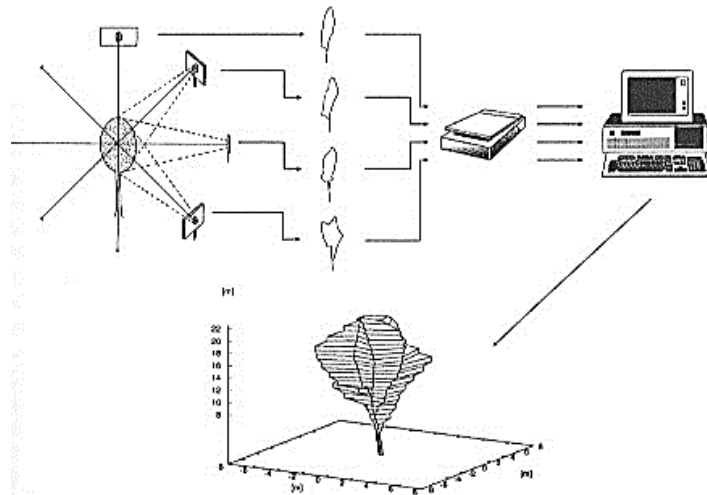

**Figure S1.** The three-dimensional shape of a crown and its volume were determined with the crown window approach. From four directions in the stand, we took drawings of the crown silhouette at scale at the observer height of 1.8 m. The four drawings were digitized and overlaid using the software WinDig, version 2.5 (Lovy 1996) and CrownShape (M. Hagemeyer, unpubl.) for calculating individual polyhedrons that visualized the shape of the crown in good approximation of the natural conditions.
